# Supplementary material for: In Silico Design of Human IMPDH Inhibitors Using Pharmacophore Mapping and Molecular Docking Approaches
Source: Hindawi journal article supplement (doi:10.1155/2015/418767), 2015-01-01
Supplement: f1 [file 418767.f1.pdf]

## Supplementary Materials

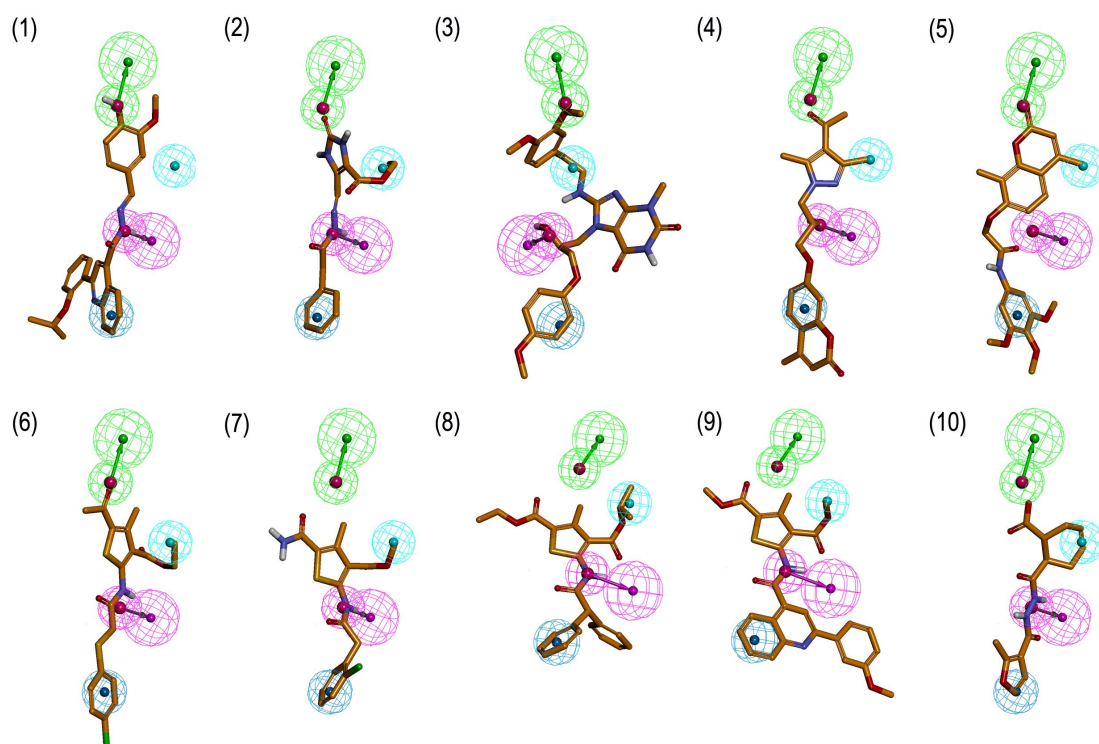

**Figure S1.** 3D structures of all ten proposed inhibitors mapping onto the ligand-based pharmacophore model.

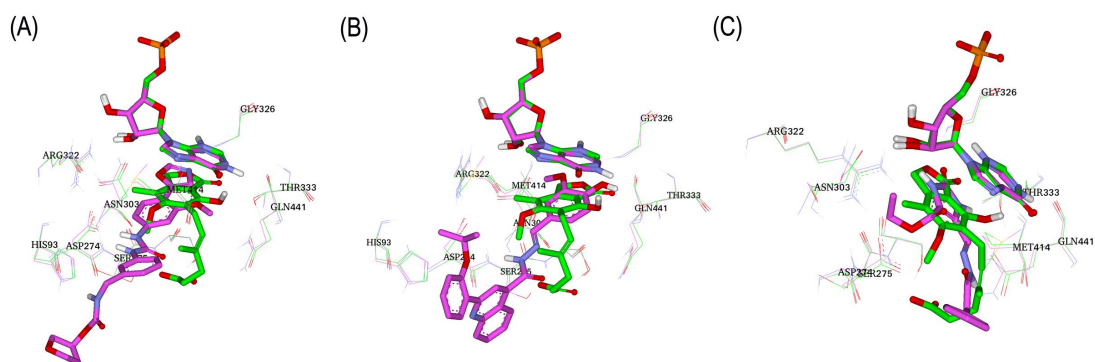

**Figure S2.** Close-up of superimposition between 1JR1 crystal structure (green) and docked structures of IMPDH in complex with inhibitors (magenta). For clarity, side chains that form this position of the inhibitor-binding pocket have been labeled. (A) A superimposition of MAP and VX-497. (B) A superimposition of MAP and

ZINC02090792. (C) A superimposition of MAP and ZINC00048033.
